# Supplementary material
Source: PubMed Central journal article supplement (PMC3100981)
Supplement: 1019175108_pnas.201019175SI.pdf [file 1019175108_pnas.201019175SI.pdf]

# Supporting Information

Kleinschmidt et al. 10.1073/pnas.1019175108

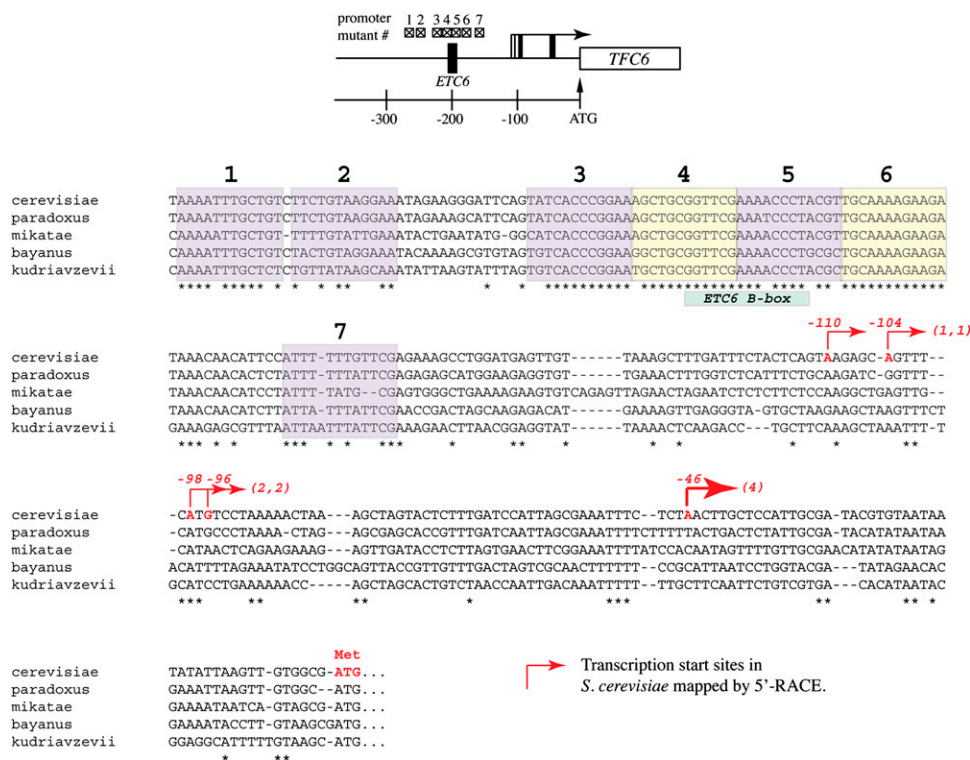

**Fig. S1.** Comparisons of the *TFC6* promoter region in budding yeast species. Sequences were aligned using Clustal software available through the *Saccharomyces* Genome Database website. Shaded boxes covering regions of highest homology were designated as sites 1–7 and were mutated as described in *Materials and Methods*; mutagenic oligonucleotides are listed in [Table S3](#). Transcription start sites marked in red were determined by 5'-RACE analysis. The numbers above each arrow refer to the location of the start site relative to the start codon (Met), and the numbers in parentheses are the number of independent 5'-RACE clones obtained for that start site. The region of the *ETC6* B-box is marked by the green shading. Promoter mutants were constructed by site-directed mutagenesis of plasmid pDD1098, which contains the *TFC6-ESC2* intergenic region (from *Saccharomyces* Genome Database chromosome IV coordinates 1,198,718–1,199,357; <http://www.yeastgenome.org/>; accessed October 20, 2010) cloned into Bluescript SK+. Each mutant had a 12-bp region replaced with a *DrdI* restriction enzyme site (Quik-Change kit, Stratagene), which allowed scrambling of 10–12 bp within each region and initial restriction digest screening of mutants, which were verified by DNA sequencing.

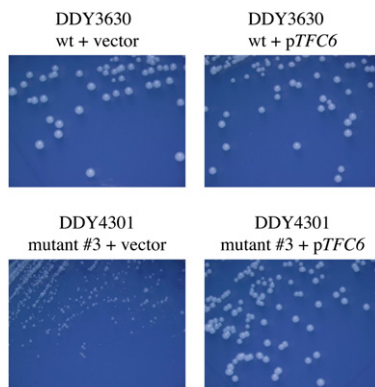

**Fig. S2.** *TFC6* promoter mutant 3 exhibits a slow growth phenotype due to insufficient *TFC6* expression. Wild-type (DDY3630) and promoter mutant 3 (DDY4301) strains were transformed with either *HIS3* vector (pRS413) or the same vector containing the *TFC6* gene (pDD1179) and streaked onto minimal media lacking histidine. The slow growth phenotype of strain DDY4301 is complemented by the *TFC6*-expressing plasmid. Identical complementation results were obtained using two independent promoter mutant 3 isolates and also strain DDY4114 (described in ref. 1), which has the *ETC6* site and the upstream region deleted.

1. Simms TA, et al. (2008) TFIIIC binding sites function as both heterochromatin barriers and chromatin insulators in *Saccharomyces cerevisiae*. *Eukaryot Cell* 7:2078–2086.

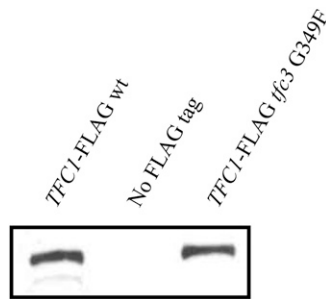

**Fig. S3.** Tfc1p levels are not significantly affected by the *tfc3*-G349E temperature-sensitive mutation. Whole-cell extracts from *TFC1*-3×FLAG strains were prepared, and equivalent protein amounts were immunoprecipitated with anti-FLAG antibody. The immunoprecipitates were subjected to Western blot analysis with anti-FLAG primary antibody. No significant difference was seen in the wild-type versus *tfc3*-G349E mutant.

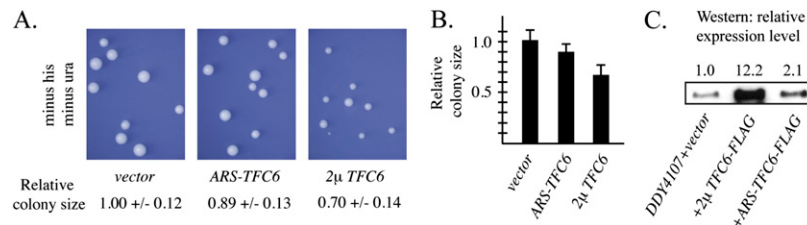

**Fig. S4.** Tfc6p inhibition of its own promoter is dose-dependent. (A) Strain DDY4403 containing the *TFC6* promoter driving *URA3* was transformed with empty *HIS3* vector, low-copy *ARS-CEN-TFC6* plasmid, or high-copy  $2\mu$ -*TFC6* plasmid. Platings and colony size determinations were as in Fig. 3 and as described in *Materials and Methods*. (B) Bar graph represents the measurement of at least 30 colonies from three separate images. (C) Western blot analysis to estimate the relative level of overexpression of *TFC6*. The same plasmids used in A and B were modified to contain the identical triple FLAG epitope that is integrated as a single copy in the haploid strain DDY4107 (pDD1244 =  $2\mu$  *TFC6*-3×FLAG and pDD1245 = *ARS-CEN TFC6*-3×FLAG). DDY4107 was then transformed either with empty *HIS3* vector (pRS413) to measure normal Tfc6p levels or with each of the *TFC6*-FLAG plasmids. Total protein extracts from each strain were prepared and equal protein amounts were immunoprecipitated with anti-FLAG M2 monoclonal antibody (Sigma), and the concentrated immunoprecipitates were analyzed by Western blotting using the same antibody. Relative amounts were assessed by scanning the blot on a Pharmacia Typhoon 8600 PhosphorImager on the chemiluminescent setting and by using ImageQuant software to measure the relative signals.

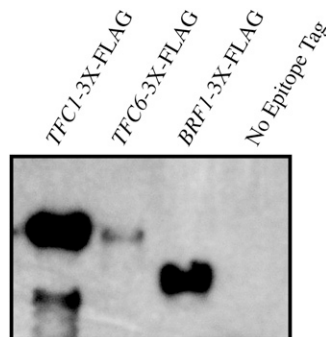

**Fig. S5.** Western blot analysis of yeast strains containing identical carboxyl-terminal triple-FLAG epitope tags on *TFC1* (DDY4381), *TFC6* (DDY4107), or *BRF1* (DDY844). Total protein extracts from each strain were prepared, and equal protein amounts were immunoprecipitated with anti-FLAG M2 monoclonal antibody (Sigma), and the concentrated immunoprecipitates were analyzed by Western blotting using the same antibody. Tfc6p protein levels are limiting compared with Tfc1p and Brf1p levels.

**Table S1. Yeast strains**

| Strain number | Genotype                                                                                                                               | Source           |
|---------------|----------------------------------------------------------------------------------------------------------------------------------------|------------------|
| DDY3          | <i>MATa ADE2 his3-11 leu2-3,112 lys2Δ trp1-1 ura3-1</i>                                                                                | Donze laboratory |
| DDY232        | <i>MATα ADE2 his3-11 leu2-3,112 LYS2 trp1-1 ura3-1 rpc31-236 hmrΔ</i>                                                                  | Donze laboratory |
| DDY237        | <i>MATα ADE2 his3-11 leu2-3,112 LYS2 trp1-1 ura3-1 tfc3-G349E hmrΔ</i>                                                                 | Donze laboratory |
| DDY246        | <i>MATα ade2-1 his3-11 leu2-3,112 LYS2 trp1-1 ura3-1 rpc160-Δ1::HIS3 p-rpc160-112</i>                                                  | Donze laboratory |
| DDY247        | <i>MATa ade2-1 his3-11 leu2-3,112 LYS2 trp1-1 ura3-1 rpc160-Δ1::HIS3 p-rpc160-112</i>                                                  | Donze laboratory |
| DDY261        | <i>MATα ADE2 his3-11 leu2-3,112 LYS2 trp1-1 ura3-1 tfc3-G349E hmrΔ</i>                                                                 | Donze laboratory |
| DDY269        | <i>MATα ADE2 his3-11 leu2-3,112 lys2Δ trp1-1 ura3-1 rpc31-236 hmrΔ</i>                                                                 | Donze laboratory |
| DDY416        | <i>MATa ADE2 his3-11 leu2-3,112 lys2Δ trp1-1 ura3-1 brf1Δ::HIS3 p-brf1 II.9 hmrΔ</i>                                                   | Donze laboratory |
| DDY420        | <i>MATα ADE2 his3-11 leu2-3,112 lys2Δ trp1-1 ura3-1 brf1Δ::HIS3 p-brf1 II.6 hmrΔ</i>                                                   | Donze laboratory |
| DDY844        | <i>MATα ADE2 his4-519 leu2-3,112 LYS2 trp1-1 ura3-52 BRF1-3×FLAG-KanMX</i>                                                             | Donze laboratory |
| DDY3453       | <i>MATa ADE2 his3-11 leu2-3,112 lys2Δ trp1-1 ura3-1 etc6Δ::URA3</i>                                                                    | Donze laboratory |
| DDY4107       | <i>MATa ADE2 his3-11 leu2-3,112 lys2Δ trp1-1 ura3-1 TFC6:3×FLAG:KanMX</i>                                                              | Donze laboratory |
| DDY4274       | <i>MATa ADE2 his3-11 leu2-3,112 lys2Δ trp1-1 ura3-1 tfc6 promoter mutant 1</i>                                                         | This study       |
| DDY4297       | <i>MATa ADE2 his3-11 leu2-3,112 lys2Δ trp1-1 ura3-1 tfc6 promoter mutant 2</i>                                                         | This study       |
| DDY4300       | <i>MATa ADE2 his3-11 leu2-3,112 lys2Δ trp1-1 ura3-1 tfc6 promoter mutant 3</i>                                                         | This study       |
| DDY4304       | <i>MATa ADE2 his3-11 leu2-3,112 lys2Δ trp1-1 ura3-1 tfc6 promoter mutant 4</i>                                                         | This study       |
| DDY4306       | <i>MATa ADE2 his3-11 leu2-3,112 lys2Δ trp1-1 ura3-1 tfc6 promoter mutant 5</i>                                                         | This study       |
| DDY4309       | <i>MATa ADE2 his3-11 leu2-3,112 lys2Δ trp1-1 ura3-1 tfc6 promoter mutant 6</i>                                                         | This study       |
| DDY4312       | <i>MATa ADE2 his3-11 leu2-3,112 lys2Δ trp1-1 ura3-1 tfc6 promoter mutant 7</i>                                                         | This study       |
| DDY4077       | <i>MATa ADE2 his3-11 leu2-3, 112 LYS2 trp1-1 ura3-1 etc6 boxB TFC1-3×FLAG::KanMX</i>                                                   | This study       |
| DDY4376       | <i>MATa ADE2 his3-11 leu2-3, 112 lys2Δ trp1-1 ura3-1 tfc3-G349E TFC1-3×FLAG::KanMX</i>                                                 | This study       |
| DDY4381       | <i>MATα ADE2 his3-11 leu2-3, 112 lys2Δ trp1-1 ura3-1 TFC1-3×FLAG::KanMX</i>                                                            | This study       |
| DDY4403       | <i>MATα/MATa ADE2/ADE2 his3Δ1/his3Δ1 leu2Δ0/leu2Δ0 LYS2/lys2Δ0 met15Δ0/MET15 TRP1/TRP1 ura3Δ0/ura3Δ0 TFC6/tfc6Δ::URA3</i>              | This study       |
| DDY4520       | <i>MATα/MATa ade2-1/ADE2 his3-11/his3-11 leu2-3,112/leu2-3, 112 LYS2/lys2Δ trp1-1/trp1-1 ura3-1/ura3-1 TFC6/tfc6Δ::URA3</i>            | This study       |
| DDY4521       | <i>MATα/MATa ade2-1/ADE2 his3-11/his3-11 leu2-3,112/leu2-3, 112 LYS2/lys2Δ trp1-1/trp1-1 ura3-1/ura3-1 TFC6/etc6 b-box-tfc6Δ::URA3</i> | This study       |

All strains are isogenic to *S. cerevisiae* W-303 except for DDY4403, which is in the S288C background (BY4743 parent). Most experiments were confirmed with at least three independent isolates, and only those isolates depicted in each of the figures are listed. Strains 4403, 4520, and 4521 contain the *URA3* ORF expressed from the *TFC6* promoter as described in the main text and *Materials and Methods*.

**Table S2. Plasmids**

|         | Source                                                           |            |
|---------|------------------------------------------------------------------|------------|
| pRS406  | <i>URA3</i> vector                                               | 1          |
| pRS413  | ARS-CEN <i>HIS3</i> vector                                       | 1          |
| pRS423  | 2μ <i>HIS3</i> vector                                            | 2          |
| pDD1098 | <i>TFC6-ESC2</i> intergenic region (~640 bp) in Bluescript SK+   | 3          |
| pDD1179 | <i>TFC6</i> in pRS413, ARS-CEN <i>HIS3</i>                       | This study |
| pDD1184 | <i>TFC6</i> promoter mutant 1                                    | This study |
| pDD1185 | <i>TFC6</i> promoter mutant 2                                    | This study |
| pDD1186 | <i>TFC6</i> promoter mutant 3                                    | This study |
| pDD1187 | <i>TFC6</i> promoter mutant 4                                    | This study |
| pDD1188 | <i>TFC6</i> promoter mutant 5                                    | This study |
| pDD1189 | <i>TFC6</i> promoter mutant 6                                    | This study |
| pDD1190 | <i>TFC6</i> promoter mutant 7                                    | This study |
| pDD1197 | <i>TFC6</i> in pRS423, 2μ <i>HIS3</i>                            | This study |
| pDD1221 | <i>TFC4</i> in pRS423, 2μ <i>HIS3</i>                            | This study |
| pDD1226 | <i>TFC1</i> in pRS423, 2μ <i>HIS3</i>                            | This study |
| pDD1228 | <i>TFC3</i> in pRS423, 2μ <i>HIS3</i>                            | This study |
| pDD1234 | <i>ADH1</i> promoter- <i>TFC6</i> in pRS413, ARS-CEN <i>HIS3</i> | This study |
| pDD1244 | <i>TFC6-3×FLAG</i> in pRS423, 2μ <i>HIS3</i>                     | This study |
| pDD1245 | <i>TFC6-3×FLAG</i> in pRS413, ARS-CEN <i>HIS3</i>                | This study |

1. Sikorski RS, Hieter P (1989) A system of shuttle vectors and yeast host strains designed for efficient manipulation of DNA in *Saccharomyces cerevisiae*. *Genetics* 122:19–27.
2. Christianson TW, Sikorski RS, Dante M, Shero JH, Hieter P (1992) Multifunctional yeast high-copy-number shuttle vectors. *Gene* 110:119–122.
3. Simms TA, et al. (2008) TFIIC binding sites function as both heterochromatin barriers and chromatin insulators in *Saccharomyces cerevisiae*. *Eukaryot Cell* 7:2078–2086.

**Table S3. Oligonucleotides**

TFC6 promoter mutagenesis\*

|          |                                                                |                               |
|----------|----------------------------------------------------------------|-------------------------------|
| DDO-1135 | CATTTCTTTTCTTATATGCTACAATGACCGGGTAGTCCTTCTG<br>TAAGGAAATAGAAGG | TFC6 promoter mutant 1 top    |
| DDO-1136 | CCTTCTATTTCTTACAGAAGGACTACCCGGTCATTGTA<br>GCATATAAGAAAAGAAATG  | TFC6 promoter mutant 1 bottom |
| DDO-1137 | GCTACAATAAAATTTGCTGTGCGAGCTGCTGTCATAGAA<br>GGGATTCAAGTATCACC   | TFC6 promoter mutant 2 top    |
| DDO-1138 | GGTGATACTGAATCCCTTCTATGACAGGCACGTCGA<br>CAGCAAATTTTATTGTAGC    | TFC6 promoter mutant 2 bottom |
| DDO-1139 | GTAAGGAAATAGAAGGATTACAGGACACAAATGTCAGCT<br>GCGGTTTCGAAAACCCTAC | TFC6 promoter mutant 3 top    |
| DDO-1140 | GTAGGGTTTTCGAACCAGCTGACATTTGTGCTCTGAA<br>TCCCTTCTATTTCTTAC     | TFC6 promoter mutant 3 bottom |
| DDO-1141 | GGATTCAAGTATCACCCGGAAGACGTATTGGTCAAAC<br>CTACGTTGCAAAGAAG      | TFC6 promoter mutant 4 top    |
| DDO-1142 | CTTCTTTGCAACGTAGGGTTTTGACCAATACGT<br>CTCCGGGTGATACTGAATCC      | TFC6 promoter mutant 4 bottom |
| DDO-1143 | CACCCGAAAGCTGCGGTTTCGGACCAAAGCGTCTGC<br>AAAAGAAGATAAACCAACATTC | TFC6 promoter mutant 5 top    |
| DDO-1144 | GAATGTTGTTTATCTTCTTTGCGACGCTTTGGTCCGA<br>ACCGCAGCTTTCCGGGTG    | TFC6 promoter mutant 5 bottom |
| DDO-1145 | CGGTTGAAAACCTACGTGACCCCCCTGCTAAAC<br>AACATTCCATTTTTTGTTCG      | TFC6 promoter mutant 6 top    |
| DDO-1146 | CGAACAAAAAATGGAATGTTGTTAGACGAGGGGGT<br>CACGTAGGGTTTTCGAACCG    | TFC6 promoter mutant 6 bottom |
| DDO-1147 | GCAAAAGAAGATAAACAACATTCGACTTTGTGTC<br>GAAAGCCTGGATGAGTTG       | TFC6 promoter mutant 7 top    |
| DDO-1148 | CAACTCATCCAGGCTTTCTGACACAAAAGTCGGAATG<br>TTGTTTATCTTCTTTG      | TFC6 promoter mutant 7 bottom |

## Chromatin immunoprecipitation

|          |                              |                                      |
|----------|------------------------------|--------------------------------------|
| DDO-305  | CGTGCCGGTGAAACATATATGTCT     | Chromosome XVI tF(GAA)P2 ChIP top    |
| DDO-306  | CAAGTTCAAGAACCAACTTTCCGC     | Chromosome XVI tF(GAA)P2 ChIP bottom |
| DDO-307  | GCACTAGTTGATTCTGTTCCAACAG    | Chromosome VII tK(CUU)G1 ChIP top    |
| DDO-308  | CCGTTTTTCCCAGAGCACTTTTA      | Chromosome VII tK(CUU)G1 ChIP bottom |
| DDO-705  | ATTATTACACGTATCGCAATGG       | ETC6 ChIP top                        |
| DDO-1093 | CTTCTGGAATCACCGGTATC         | ETC6 ChIP bottom                     |
| DDO-1023 | CCATATACATATCCATATCTAATC     | GAL LOCUS ChIP top                   |
| DDO-1024 | ATAACCATAAAAGCTAGTATTGTAG    | GAL LOCUS ChIP bottom                |
| DDO-1215 | GCCATTCTTATCTTCCAAG          | ETC4 ChIP top                        |
| DDO-698  | AAGTAAGGTTTGATATGCGG         | ETC4 ChIP bottom                     |
| DDO-1343 | GTCTTAGTTTGATTGAGCGACAAG     | ETC5/RNA170 ChIP top                 |
| DDO-1344 | AAACAAGGGTTGTGGAGTATGC       | ETC5/RNA170 ChIP bottom              |
| DDO-1345 | TAGCAGTTTATGTACGCATTTTAAAAGC | ZOD1 ChIP top                        |
| DDO-1346 | TGCTGTCTTATCCCTAGTGTC        | ZOD1 ChIP bottom                     |
| DDO-1402 | TACGACATCAAAGTCGCCGAG        | Chromosome XII tR(CCG)L ChIP top     |
| DDO-1403 | ATTGACAGCCCTACGCGAAG         | Chromosome XII tR(CCG)L ChIP bottom  |

Knockout and insertion<sup>†</sup>

|          |                                                                                               |                            |
|----------|-----------------------------------------------------------------------------------------------|----------------------------|
| DDO-792  | CAACTCATCCAGGCTTTCTCGAACAAAAAATGGAATGTTGTTTATC<br>TTCTTTT <b>GCAGATTGTA</b> CTG <b>AGAGTG</b> | ETC6 delete URA3 KO TOP    |
| DDO-793  | ATTTGCTGCTTCTGTAAGGAAATAGAAGGATTCAAGTATCACCCG<br>GAAAGCTCTCCTT <b>ACGCATCTGTGCGG</b>          | ETC6 delete URA3 KO BOTTOM |
| DDO-1201 | CTCTAACTTGCTCCATTGCGATACGTGTAATAATATATTAAGTT<br>GTGGCGATGTG <b>CAAAGCTACATAAAG</b>            | TFC6 del URA3 ORF top      |
| DDO-1202 | GTCAACAATAGTTCAATGT <b>CACAAATG</b> TATTTATTACGTAA<br>AGTCCATCTTAGTTT <b>GCTGGCCGCATC</b>     | TFC6 del URA3 ORF bottom   |

ChIP, chromatin immunoprecipitation.

\*Bases in italic correspond to the DrdI site described in *Materials and Methods*.<sup>†</sup>Bases in boldface correspond to the pRS416 plasmid sequence adjacent to *URA3*. Underlined bases correspond to the start and end of the *URA3* ORF.
